# Supplementary material for: Effects of brackish water inflow on methane cycling microbial communities in a freshwater rewetted coastal fen
Source: Copernicus journal article supplement (doi:10.5194/egusphere-2022-65), 2022-04-13
Supplement: Supplementary file 1 [file egusphere-2022-65-supplement.zip]

Archive with 3 entries (3 files):
- Table S2.pdf
- C-Gutekunst-R-Markdown.pdf
- Table S1.pdf
