# Supplementary material for: Effects of brackish water inflow on methane cycling microbial communities in a freshwater rewetted coastal fen
Source: Copernicus journal article supplement (doi:10.5194/egusphere-2022-65), 2022-04-13
Supplement: Supplementary file 1 [file egusphere-2022-65-supplement.zip › Table S1.pdf]

## Supplements

**Table S1: Average values (mean, if not marked otherwise) of CH<sub>4</sub> gas fluxes, surface and pore water variables, trace gas concentrations and isotopic signatures of CH<sub>4</sub> and DIC and absolute DNA- and cDNA-based abundances of microorganisms**

| Variable             | Sampling campaign | Location | Mean value                                 | Reference             | Remark |
|----------------------|-------------------|----------|--------------------------------------------|-----------------------|--------|
| CH <sub>4</sub> flux | post-infl19_spr   | HC1      | 4.9 mg m <sup>-2</sup> d <sup>-1</sup>     | this study            |        |
| CH <sub>4</sub> flux | post-infl19_spr   | HC2      | 7.6 mg m <sup>-2</sup> d <sup>-1</sup>     | this study            |        |
| CH <sub>4</sub> flux | post-infl19_spr   | HC3      | 0.6 mg m <sup>-2</sup> d <sup>-1</sup>     | this study            |        |
| CH <sub>4</sub> flux | post-infl19_spr   | HC4      | 1.1 mg m <sup>-2</sup> d <sup>-1</sup>     | this study            |        |
| CH <sub>4</sub> flux | post-infl19_aut   | HC1      | 107 mg m <sup>-2</sup> d <sup>-1</sup>     | this study            |        |
| CH <sub>4</sub> flux | post-infl19_aut   | HC2      | NA                                         | this study            |        |
| CH <sub>4</sub> flux | post-infl19_aut   | HC3      | 9.6 mg m <sup>-2</sup> d <sup>-1</sup>     | this study            |        |
| CH <sub>4</sub> flux | post-infl19_aut   | HC4      | (-14.2) mg m <sup>-2</sup> d <sup>-1</sup> | this study            |        |
| EC (surface water)   | base14            |          | 2 mS/cm                                    | Bohne and Bohne, 2008 |        |
| EC (surface water)   | drought18         | HC2      | 0.6 mS/cm                                  | Ibenthal, 2020        |        |
| EC (surface water)   | post-infl19_spr   | HC1-4    | 9.3 mS/cm                                  | this study            |        |
| EC (surface water)   | post-infl19_spr   | HC1      | 7.5 mS/cm                                  | this study            |        |
| EC (surface water)   | post-infl19_spr   | HC2      | 8.0 mS/cm                                  | this study            |        |
| EC (surface water)   | post-infl19_spr   | HC3      | 12.5 mS/cm                                 | this study            |        |
| EC (surface water)   | post-infl19_spr   | HC4      | 12.1 mS/cm                                 | this study            |        |

|                                               |                 |       |           |                |                       |
|-----------------------------------------------|-----------------|-------|-----------|----------------|-----------------------|
| EC (surface water)                            | post-infl19_aut | HC1-4 | 7.6 mS/cm | this study     |                       |
| EC (surface water)                            | post-infl19_aut | HC1   | 5.3 mS/cm | this study     |                       |
| EC (surface water)                            | post-infl19_aut | HC2   | 6.3 mS/cm | this study     |                       |
| EC (surface water)                            | post-infl19_aut | HC3   | 8.7 mS/cm | this study     |                       |
| EC (surface water)                            | post-infl19_aut | HC4   | 8.7 mS/cm | this study     |                       |
| SO <sub>4</sub> <sup>2-</sup> (surface water) | drought18       | HC2   | 0.1 mM    | Ibenthal, 2020 | measured with IC      |
| SO <sub>4</sub> <sup>2-</sup> (surface water) | post-infl19_spr | HC2   | 5.6 mM    | this study     | measured with IC      |
| SO <sub>4</sub> <sup>2-</sup> (surface water) | post-infl19_spr | HC1-4 | 2.6 mM    | this study     | measured with ICP-OES |
| SO <sub>4</sub> <sup>2-</sup> (surface water) | post-infl19_spr | HC1   | 2.7 mM    | this study     | measured with ICP-OES |
| SO <sub>4</sub> <sup>2-</sup> (surface water) | post-infl19_spr | HC2   | 2.6 mM    | this study     | measured with ICP-OES |
| SO <sub>4</sub> <sup>2-</sup> (surface water) | post-infl19_spr | HC3   | 1.2 mM    | this study     | measured with ICP-OES |
| SO <sub>4</sub> <sup>2-</sup> (surface water) | post-infl19_spr | HC4   | 3.9 mM    | this study     | measured with ICP-OES |
| SO <sub>4</sub> <sup>2-</sup> (surface water) | post-infl19_aut | HC2   | 0.63 mM   | this study     | measured with IC      |
| SO <sub>4</sub> <sup>2-</sup> (surface water) | post-infl19_aut | HC1-4 | 0.6 mM    | this study     | measured with ICP-OES |
| SO <sub>4</sub> <sup>2-</sup> (surface water) | post-infl19_aut | HC1   | 0.2 mM    | this study     | measured with ICP-OES |

|                                                                 |                 |       |          |                |                       |
|-----------------------------------------------------------------|-----------------|-------|----------|----------------|-----------------------|
| SO <sub>4</sub> <sup>2-</sup> (surface water)                   | post-infl19_aut | HC2   | 0.3 mM   | this study     | measured with ICP-OES |
| SO <sub>4</sub> <sup>2-</sup> (surface water)                   | post-infl19_aut | HC3   | 0.7 mM   | this study     | measured with ICP-OES |
| SO <sub>4</sub> <sup>2-</sup> (surface water)                   | post-infl19_aut | HC4   | 1.2 mM   | this study     | measured with ICP-OES |
| Cl <sup>-</sup> (surface water)                                 | drought18       | HC2   | 2.9 mM   | Ibenthal, 2020 | measured with IC      |
| Cl <sup>-</sup> (surface water)                                 | post-infl19_spr | HC2   | 55.6 mM  | this study     | measured with IC      |
| Cl <sup>-</sup> (surface water)                                 | post-infl19_spr | HC1-4 | 23.81 mM | this study     | measured with ICP-OES |
| Cl <sup>-</sup> (surface water)                                 | post-infl19_spr | HC1   | 22.8 mM  | this study     | measured with ICP-OES |
| Cl <sup>-</sup> (surface water)                                 | post-infl19_spr | HC2   | 25.0 mM  | this study     | measured with ICP-OES |
| Cl <sup>-</sup> (surface water)                                 | post-infl19_spr | HC3   | 13.4 mM  | this study     | measured with ICP-OES |
| Cl <sup>-</sup> (surface water)                                 | post-infl19_spr | HC4   | 33.9 mM  | this study     | measured with ICP-OES |
| Cl <sup>-</sup> (surface water)                                 | post-infl19_aut | HC2   | 60.6 mM  | this study     | measured with IC      |
| Cl <sup>-</sup> (surface water)                                 | post-infl19_aut | HC1-4 | 27.5 mM  | this study     | measured with ICP-OES |
| Cl <sup>-</sup> (surface water)                                 | post-infl19_aut | HC1   | 12.4 mM  | this study     | measured with ICP-OES |
| Cl <sup>-</sup> (surface water)                                 | post-infl19_aut | HC2   | 18.0 mM  | this study     | measured with ICP-OES |
| Cl <sup>-</sup> (surface water)                                 | post-infl19_aut | HC3   | 32.4 mM  | this study     | measured with ICP-OES |
| Cl <sup>-</sup> (surface water)                                 | post-infl19_aut | HC4   | 47.3 mM  | this study     | measured with ICP-OES |
| SO <sub>4</sub> <sup>2-</sup> / Cl <sup>-</sup> (surface water) | drought18       | HC2   | 0.04     | Ibenthal, 2020 | measured with IC      |
| SO <sub>4</sub> <sup>2-</sup> / Cl <sup>-</sup> (surface water) | post-infl19_spr | HC2   | 0.1      | this study     | measured with IC      |

|                                                                 |                 |       |           |                     |                       |
|-----------------------------------------------------------------|-----------------|-------|-----------|---------------------|-----------------------|
| SO <sub>4</sub> <sup>2-</sup> / Cl <sup>-</sup> (surface water) | post-infl19_spr | HC1-4 | 0.11      | this study          | measured with ICP-OES |
| SO <sub>4</sub> <sup>2-</sup> / Cl <sup>-</sup> (surface water) | post-infl19_spr | HC1   | 0.12      | this study          | measured with ICP-OES |
| SO <sub>4</sub> <sup>2-</sup> / Cl <sup>-</sup> (surface water) | post-infl19_spr | HC2   | 0.1       | this study          | measured with ICP-OES |
| SO <sub>4</sub> <sup>2-</sup> / Cl <sup>-</sup> (surface water) | post-infl19_spr | HC3   | 0.09      | this study          | measured with ICP-OES |
| SO <sub>4</sub> <sup>2-</sup> / Cl <sup>-</sup> (surface water) | post-infl19_spr | HC4   | 0.12      | this study          | measured with ICP-OES |
| SO <sub>4</sub> <sup>2-</sup> / Cl <sup>-</sup> (surface water) | post-infl19_aut | HC1-4 | 0.02      | this study          | measured with ICP-OES |
| SO <sub>4</sub> <sup>2-</sup> / Cl <sup>-</sup> (surface water) | post-infl19_aut | HC2   | 0.01      | this study          | measured with IC      |
| SO <sub>4</sub> <sup>2-</sup> / Cl <sup>-</sup> (surface water) | post-infl19_aut | HC1   | 0.01      | this study          | measured with ICP-OES |
| SO <sub>4</sub> <sup>2-</sup> / Cl <sup>-</sup> (surface water) | post-infl19_aut | HC2   | 0.02      | this study          | measured with ICP-OES |
| SO <sub>4</sub> <sup>2-</sup> / Cl <sup>-</sup> (surface water) | post-infl19_aut | HC3   | 0.02      | this study          | measured with ICP-OES |
| SO <sub>4</sub> <sup>2-</sup> / Cl <sup>-</sup> (surface water) | post-infl19_aut | HC4   | 0.03      | this study          | measured with ICP-OES |
| EC (pore water)                                                 | base14          | HC1-4 | 5.1 mS/cm | Wen et al.,<br>2018 |                       |
| EC (pore water)                                                 | base14          | HC1   | 2.2 mS/cm | Wen et al.,<br>2018 |                       |

|                                            |                 |       |            |                       |                       |
|--------------------------------------------|-----------------|-------|------------|-----------------------|-----------------------|
| EC (pore water)                            | base14          | HC2   | 6.3 mS/cm  | Wen et al.,<br>2018   |                       |
| EC (pore water)                            | base14          | HC3   | 5.8 mS/cm  | Wen et al.,<br>2018   |                       |
| EC (pore water)                            | base14          | HC4   | 5.0 mS/cm  | Wen et al.,<br>2018   |                       |
| EC (pore water)                            | post-infl19_spr | HC2   | 7.4 mS/cm  | this study            |                       |
| EC (pore water)                            | post-infl19_aut | HC1-4 | 9.1 mS/cm  | this study            |                       |
| EC (pore water)                            | post-infl19_aut | HC1   | 5.4 mS/cm  | this study            |                       |
| EC (pore water)                            | post-infl19_aut | HC2   | 10.6 mS/cm | this study            |                       |
| EC (pore water)                            | post-infl19_aut | HC3   | 9.2 mS/cm  | this study            |                       |
| EC (pore water)                            | post-infl19_aut | HC4   | 11.3 mS/cm | this study            |                       |
| SO <sub>4</sub> <sup>2-</sup> (pore water) | base14          | HC1-4 | 1.1 mM     | Wen et al.,<br>2018   | measured with ICP-OES |
| SO <sub>4</sub> <sup>2-</sup> (pore water) | base14          | HC1   | 0.01 mM    | Wen et al.,<br>2018   | measured with ICP-OES |
| SO <sub>4</sub> <sup>2-</sup> (pore water) | base14          | HC2   | 3.5 mM     | Wen et al.,<br>2018   | measured with ICP-OES |
| SO <sub>4</sub> <sup>2-</sup> (pore water) | base14          | HC3   | 0.02 mM    | Wen et al.,<br>2018   | measured with ICP-OES |
| SO <sub>4</sub> <sup>2-</sup> (pore water) | base14          | HC4   | 0.158 mM   | Wen et al.,<br>2018   | measured with ICP-OES |
| SO <sub>4</sub> <sup>2-</sup> (pore water) | drought18       | HC2   | 21.6 mM    | Unger et al.,<br>2021 | measured with ICP-OES |
| SO <sub>4</sub> <sup>2-</sup> (pore water) | post-infl19_aut | HC1-4 | 5.3 mM     | this study            | measured with ICP-OES |
| SO <sub>4</sub> <sup>2-</sup> (pore water) | post-infl19_aut | HC1   | 9.9 mM     | this study            | measured with ICP-OES |

|                                                              |                 |       |          |                       |                       |
|--------------------------------------------------------------|-----------------|-------|----------|-----------------------|-----------------------|
| SO <sub>4</sub> <sup>2-</sup> (pore water)                   | post-infl19_aut | HC2   | 8.6 mM   | this study            | measured with ICP-OES |
| SO <sub>4</sub> <sup>2-</sup> (pore water)                   | post-infl19_aut | HC3   | 0.82 mM  | this study            | measured with ICP-OES |
| SO <sub>4</sub> <sup>2-</sup> (pore water)                   | post-infl19_aut | HC4   | 0.69 mM  | this study            | measured with ICP-OES |
| Cl <sup>-</sup> (pore water)                                 | base14          | HC1-4 | 37.8 mM  | Wen et al.,<br>2018   | measured with ICP-OES |
| Cl <sup>-</sup> (pore water)                                 | base14          | HC1   | 12.42 mM | Wen et al.,<br>2018   | measured with ICP-OES |
| Cl <sup>-</sup> (pore water)                                 | base14          | HC2   | 42.9 mM  | Wen et al.,<br>2018   | measured with ICP-OES |
| Cl <sup>-</sup> (pore water)                                 | base14          | HC3   | 47.4 mM  | Wen et al.,<br>2018   | measured with ICP-OES |
| Cl <sup>-</sup> (pore water)                                 | base14          | HC4   | 40.5 mM  | Wen et al.,<br>2018   | measured with ICP-OES |
| Cl <sup>-</sup> (pore water)                                 | drought18       | HC2   | 45.1 mM  | Unger et al.,<br>2021 | measured with ICP-OES |
| Cl <sup>-</sup> (pore water)                                 | post-infl19_aut | HC1-4 | 55.1 mM  | this study            | measured with ICP-OES |
| Cl <sup>-</sup> (pore water)                                 | post-infl19_aut | HC1   | 23.5 mM  | this study            | measured with ICP-OES |
| Cl <sup>-</sup> (pore water)                                 | post-infl19_aut | HC2   | 57.1 mM  | this study            | measured with ICP-OES |
| Cl <sup>-</sup> (pore water)                                 | post-infl19_aut | HC3   | 68.1 mM  | this study            | measured with ICP-OES |
| Cl <sup>-</sup> (pore water)                                 | post-infl19_aut | HC4   | 74.8 mM  | this study            | measured with ICP-OES |
| SO <sub>4</sub> <sup>2-</sup> / Cl <sup>-</sup> (pore water) | base14          | HC1-4 | 0.029    | Wen et al.,<br>2018   | measured with ICP-OES |
| SO <sub>4</sub> <sup>2-</sup> / Cl <sup>-</sup> (pore water) | base14          | HC1   | 0.001    | Wen et al.,<br>2018   | measured with ICP-OES |
| SO <sub>4</sub> <sup>2-</sup> / Cl <sup>-</sup> (pore water) | base14          | HC2   | 0.054    | Wen et al.,<br>2018   | measured with ICP-OES |

|                                                              |                 |       |          |                    |                       |
|--------------------------------------------------------------|-----------------|-------|----------|--------------------|-----------------------|
| SO <sub>4</sub> <sup>2-</sup> / Cl <sup>-</sup> (pore water) | base14          | HC3   | 0.00006  | Wen et al., 2018   | measured with ICP-OES |
| SO <sub>4</sub> <sup>2-</sup> / Cl <sup>-</sup> (pore water) | base14          | HC4   | 0.003    | Wen et al., 2018   | measured with ICP-OES |
| SO <sub>4</sub> <sup>2-</sup> / Cl <sup>-</sup> (pore water) | drought18       | HC2   | 0.471    | Unger et al., 2021 | measured with ICP-OES |
| SO <sub>4</sub> <sup>2-</sup> / Cl <sup>-</sup> (pore water) | post-infl19_aut | HC1-4 | 0.146    | this study         | measured with ICP-OES |
| SO <sub>4</sub> <sup>2-</sup> / Cl <sup>-</sup> (pore water) | post-infl19_aut | HC1   | 0.4      | this study         | measured with ICP-OES |
| SO <sub>4</sub> <sup>2-</sup> / Cl <sup>-</sup> (pore water) | post-infl19_aut | HC2   | 0.13     | this study         | measured with ICP-OES |
| SO <sub>4</sub> <sup>2-</sup> / Cl <sup>-</sup> (pore water) | post-infl19_aut | HC3   | 0.012    | this study         | measured with ICP-OES |
| SO <sub>4</sub> <sup>2-</sup> / Cl <sup>-</sup> (pore water) | post-infl19_aut | HC4   | 0.0095   | this study         | measured with ICP-OES |
| CH <sub>4</sub> concentration                                | base14          | HC1-4 | 232.6 μM | Wen et al., 2018   |                       |
| CH <sub>4</sub> concentration                                | base14          | HC1   | 199.5 μM | Wen et al., 2018   |                       |
| CH <sub>4</sub> concentration                                | base14          | HC2   | 297.1 μM | Wen et al., 2018   |                       |
| CH <sub>4</sub> concentration                                | base14          | HC3   | 255.6 μM | Wen et al., 2018   |                       |
| CH <sub>4</sub> concentration                                | base14          | HC4   | 154.0 μM | Wen et al., 2018   |                       |

|                               |                 |       |          |                       |
|-------------------------------|-----------------|-------|----------|-----------------------|
| CH <sub>4</sub> concentration | drought18       | HC2   | 70.9 µM  | Unger et al.,<br>2021 |
| CH <sub>4</sub> concentration | post-infl19_spr | HC2   | 325 µM   | this study            |
| CH <sub>4</sub> concentration | post-infl19_aut | HC1-4 | 158.0 µM | this study            |
| CH <sub>4</sub> concentration | post-infl19_aut | HC1   | 1.4 µM   | this study            |
| CH <sub>4</sub> concentration | post-infl19_aut | HC2   | 91.0 µM  | this study            |
| CH <sub>4</sub> concentration | post-infl19_aut | HC3   | 123.8 µM | this study            |
| CH <sub>4</sub> concentration | post-infl19_aut | HC4   | 398.8 µM | this study            |
| CO <sub>2</sub> concentration | base14          | HC1-4 | 9.8 mM   | Wen et al.,<br>2018   |
| CO <sub>2</sub> concentration | base14          | HC1   | 10.2 mM  | Wen et al.,<br>2018   |
| CO <sub>2</sub> concentration | base14          | HC2   | 16.6 mM  | Wen et al.,<br>2018   |
| CO <sub>2</sub> concentration | base14          | HC3   | 4.9 mM   | Wen et al.,<br>2018   |
| CO <sub>2</sub> concentration | base14          | HC4   | 7.0 mM   | Wen et al.,<br>2018   |
| CO <sub>2</sub> concentration | drought18       | HC2   | 1.1 mM   | Unger et al.,<br>2021 |
| CO <sub>2</sub> concentration | post-infl19_spr | HC2   | 1.4 mM   | this study            |
| CO <sub>2</sub> concentration | post-infl19_aut | HC1-4 | 1.8 mM   | this study            |
| CO <sub>2</sub> concentration | post-infl19_aut | HC1   | 1.1 mM   | this study            |
| CO <sub>2</sub> concentration | post-infl19_aut | HC2   | 2.2 mM   | this study            |
| CO <sub>2</sub> concentration | post-infl19_aut | HC3   | 2.3 mM   | this study            |

|                                   |                 |       |           |                       |
|-----------------------------------|-----------------|-------|-----------|-----------------------|
| CO <sub>2</sub> concentration     | post-infl19_aut | HC4   | 1.5 mM    | this study            |
| δ <sup>13</sup> C-CH <sub>4</sub> | base14          | HC1-4 | (-60.6) ‰ | Wen et al.,<br>2018   |
| δ <sup>13</sup> C-CH <sub>4</sub> | base14          | HC1   | (-63.0) ‰ | Wen et al.,<br>2018   |
| δ <sup>13</sup> C-CH <sub>4</sub> | base14          | HC2   | (-62.0) ‰ | Wen et al.,<br>2018   |
| δ <sup>13</sup> C-CH <sub>4</sub> | base14          | HC3   | (-58.1) ‰ | Wen et al.,<br>2018   |
| δ <sup>13</sup> C-CH <sub>4</sub> | base14          | HC4   | (-60.1) ‰ | Wen et al.,<br>2018   |
| δ <sup>13</sup> C-CH <sub>4</sub> | drought18       | HC2   | (-63.5) ‰ | Unger et al.,<br>2021 |
| δ <sup>13</sup> C-CH <sub>4</sub> | post-infl19_spr | HC2   | (-63.7) ‰ | this study            |
| δ <sup>13</sup> C-CH <sub>4</sub> | post-infl19_aut | HC1-4 | (-64.7) ‰ | this study            |
| δ <sup>13</sup> C-CH <sub>4</sub> | post-infl19_aut | HC1   | (-70.8) ‰ | this study            |
| δ <sup>13</sup> C-CH <sub>4</sub> | post-infl19_aut | HC2   | (-68.0) ‰ | this study            |
| δ <sup>13</sup> C-CH <sub>4</sub> | post-infl19_aut | HC3   | (-62.3) ‰ | this study            |
| δ <sup>13</sup> C-CH <sub>4</sub> | post-infl19_aut | HC4   | (-61.6) ‰ | this study            |
| δ <sup>13</sup> C-CO <sub>2</sub> | base14          | HC1-4 | (-5.2) ‰  | Wen et al.,<br>2018   |
| δ <sup>13</sup> C-CO <sub>2</sub> | base14          | HC1   | (-4.4) ‰  | Wen et al.,<br>2018   |
| δ <sup>13</sup> C-CO <sub>2</sub> | base14          | HC2   | (-8.4) ‰  | Wen et al.,<br>2018   |

|                            |                 |       |                       |                       |                                     |
|----------------------------|-----------------|-------|-----------------------|-----------------------|-------------------------------------|
| $\delta^{13}\text{C-CO}_2$ | base14          | HC3   | (-5.5) ‰              | Wen et al.,<br>2018   |                                     |
| $\delta^{13}\text{C-CO}_2$ | base14          | HC4   | (-1.9) ‰              | Wen et al.,<br>2018   |                                     |
| $\delta^{13}\text{C-CO}_2$ | drought18       | HC2   | (-19.9) ‰             | Unger et al.,<br>2021 |                                     |
| $\delta^{13}\text{C-CO}_2$ | post-infl19_spr | HC2   | (-15.2) ‰             | this study            |                                     |
| $\delta^{13}\text{C-CO}_2$ | post-infl19_aut | HC1-4 | (-20.9) ‰             | this study            |                                     |
| $\delta^{13}\text{C-CO}_2$ | post-infl19_aut | HC1   | (-22.6) ‰             | this study            |                                     |
| $\delta^{13}\text{C-CO}_2$ | post-infl19_aut | HC2   | (-21.5) ‰             | this study            |                                     |
| $\delta^{13}\text{C-CO}_2$ | post-infl19_aut | HC3   | (-21.1) ‰             | this study            |                                     |
| $\delta^{13}\text{C-CO}_2$ | post-infl19_aut | HC4   | (-18.6) ‰             | this study            |                                     |
| 16S rRNA (DNA)             | base14          | HC1-4 | $3.25 \times 10^{10}$ | Wen et al.,<br>2018   | averages are given as median values |
| 16S rRNA (DNA)             | base14          | HC1   | $2.33 \times 10^{10}$ | Wen et al.,<br>2018   | averages are given as median values |
| 16S rRNA (DNA)             | base14          | HC2   | $1.68 \times 10^{10}$ | Wen et al.,<br>2018   | averages are given as median values |
| 16S rRNA (DNA)             | base14          | HC3   | $4.93 \times 10^{14}$ | Wen et al.,<br>2018   | averages are given as median values |
| 16S rRNA (DNA)             | base14          | HC4   | $4.57 \times 10^{10}$ | Wen et al.,<br>2018   | averages are given as median values |
| 16S rRNA (DNA)             | drought18       | HC2   | $2.02 \times 10^{10}$ | Unger et al.,<br>2021 | averages are given as median values |
| 16S rRNA (DNA)             | post-infl19_spr | HC2   | $1.50 \times 10^{10}$ | this study            | averages are given as median values |
| 16S rRNA (DNA)             | post-infl19_aut | HC1-4 | $3.00 \times 10^{10}$ | this study            | averages are given as median values |

|                   |                 |       |                       |                       |                                     |
|-------------------|-----------------|-------|-----------------------|-----------------------|-------------------------------------|
| 16S rRNA (DNA)    | post-infl19_aut | HC1   | 2.61*10 <sup>9</sup>  | this study            | averages are given as median values |
| 16S rRNA (DNA)    | post-infl19_aut | HC2   | 2.49*10 <sup>10</sup> | this study            | averages are given as median values |
| 16S rRNA (DNA)    | post-infl19_aut | HC3   | 3.18*10 <sup>10</sup> | this study            | averages are given as median values |
| 16S rRNA (DNA)    | post-infl19_aut | HC4   | 4.47*10 <sup>10</sup> | this study            | averages are given as median values |
| <i>mcrA</i> (DNA) | base14          | HC1-4 | 1.14*10 <sup>8</sup>  | Wen et al.,<br>2018   | averages are given as median values |
| <i>mcrA</i> (DNA) | base14          | HC1   | 9.77*10 <sup>7</sup>  | Wen et al.,<br>2018   | averages are given as median values |
| <i>mcrA</i> (DNA) | base14          | HC2   | 3.53*10 <sup>7</sup>  | Wen et al.,<br>2018   | averages are given as median values |
| <i>mcrA</i> (DNA) | base14          | HC3   | 4.58*10 <sup>8</sup>  | Wen et al.,<br>2018   | averages are given as median values |
| <i>mcrA</i> (DNA) | base14          | HC4   | 8.71*10 <sup>8</sup>  | Wen et al.,<br>2018   | averages are given as median values |
| <i>mcrA</i> (DNA) | drought18       | HC2   | 3.92*10 <sup>8</sup>  | Unger et al.,<br>2021 | averages are given as median values |
| <i>mcrA</i> (DNA) | post-infl19_spr | HC2   | 7.86*10 <sup>7</sup>  | this study            | averages are given as median values |
| <i>mcrA</i> (DNA) | post-infl19_aut | HC1-4 | 2.21*10 <sup>8</sup>  | this study            | averages are given as median values |
| <i>mcrA</i> (DNA) | post-infl19_aut | HC1   | 5.10*10 <sup>6</sup>  | this study            | averages are given as median values |
| <i>mcrA</i> (DNA) | post-infl19_aut | HC2   | 2.58*10 <sup>8</sup>  | this study            | averages are given as median values |
| <i>mcrA</i> (DNA) | post-infl19_aut | HC3   | 2.40*10 <sup>8</sup>  | this study            | averages are given as median values |
| <i>mcrA</i> (DNA) | post-infl19_aut | HC4   | 5.81*10 <sup>8</sup>  | this study            | averages are given as median values |
| <i>pmoA</i> (DNA) | base14          | HC1-4 | 1.34*10 <sup>7</sup>  | Wen et al.,<br>2018   | averages are given as median values |

|                   |                 |       |                      |                       |                                     |
|-------------------|-----------------|-------|----------------------|-----------------------|-------------------------------------|
| <i>pmoA (DNA)</i> | base14          | HC1   | 2.53*10 <sup>7</sup> | Wen et al.,<br>2018   | averages are given as median values |
| <i>pmoA (DNA)</i> | base14          | HC2   | 1.06*10 <sup>7</sup> | Wen et al.,<br>2018   | averages are given as median values |
| <i>pmoA (DNA)</i> | base14          | HC3   | 1.40*10 <sup>7</sup> | Wen et al.,<br>2018   | averages are given as median values |
| <i>pmoA (DNA)</i> | base14          | HC4   | 2.15*10 <sup>7</sup> | Wen et al.,<br>2018   | averages are given as median values |
| <i>pmoA (DNA)</i> | drought18       | HC2   | 2.30*10 <sup>7</sup> | Unger et al.,<br>2021 | averages are given as median values |
| <i>pmoA (DNA)</i> | post-infl19_spr | HC2   | 6.64*10 <sup>6</sup> | this study            | averages are given as median values |
| <i>pmoA (DNA)</i> | post-infl19_aut | HC1-4 | 9.46*10 <sup>6</sup> | this study            | averages are given as median values |
| <i>pmoA (DNA)</i> | post-infl19_aut | HC1   | 2.62*10 <sup>6</sup> | this study            | averages are given as median values |
| <i>pmoA (DNA)</i> | post-infl19_aut | HC2   | 5.62*10 <sup>6</sup> | this study            | averages are given as median values |
| <i>pmoA (DNA)</i> | post-infl19_aut | HC3   | 1.01*10 <sup>7</sup> | this study            | averages are given as median values |
| <i>pmoA (DNA)</i> | post-infl19_aut | HC4   | 2.42*10 <sup>7</sup> | this study            | averages are given as median values |
| <i>dsrB (DNA)</i> | base14          | HC1-4 | 8.38*10 <sup>5</sup> | Wen et al.,<br>2018   | averages are given as median values |
| <i>dsrB (DNA)</i> | base14          | HC1   | NA                   | Wen et al.,<br>2018   | averages are given as median values |
| <i>dsrB (DNA)</i> | base14          | HC2   | 9.98*10 <sup>5</sup> | Wen et al.,<br>2018   | averages are given as median values |
| <i>dsrB (DNA)</i> | base14          | HC3   | 9.77*10 <sup>5</sup> | Wen et al.,<br>2018   | averages are given as median values |
| <i>dsrB (DNA)</i> | base14          | HC4   | 7.57*10 <sup>5</sup> | Wen et al.,<br>2018   | averages are given as median values |

|                    |                 |       |                      |                       |                                     |
|--------------------|-----------------|-------|----------------------|-----------------------|-------------------------------------|
| <i>dsrB</i> (DNA)  | drought18       | HC2   | 1.75*10 <sup>6</sup> | Unger et al.,<br>2021 | averages are given as median values |
| <i>dsrB</i> (DNA)  | post-infl19_spr | HC2   | 1.13*10 <sup>8</sup> | this study            | averages are given as median values |
| <i>dsrB</i> (DNA)  | post-infl19_aut | HC1-4 | 4.26*10 <sup>8</sup> | this study            | averages are given as median values |
| <i>dsrB</i> (DNA)  | post-infl19_aut | HC1   | 3.79*10 <sup>7</sup> | this study            | averages are given as median values |
| <i>dsrB</i> (DNA)  | post-infl19_aut | HC2   | 6.38*10 <sup>8</sup> | this study            | averages are given as median values |
| <i>dsrB</i> (DNA)  | post-infl19_aut | HC3   | 3.68*10 <sup>8</sup> | this study            | averages are given as median values |
| <i>dsrB</i> (DNA)  | post-infl19_aut | HC4   | 5.97*10 <sup>8</sup> | this study            | averages are given as median values |
| 16S rRNA (cDNA)    | post-infl19_spr | HC2   | 3.19*10 <sup>8</sup> | this study            | averages are given as median values |
| 16S rRNA (cDNA)    | post-infl19_aut | HC2   | 8.72*10 <sup>9</sup> | this study            | averages are given as median values |
| <i>mcrA</i> (cDNA) | post-infl19_spr | HC2   | 686                  | this study            | averages are given as median values |
| <i>mcrA</i> (cDNA) | post-infl19_aut | HC2   | 1625                 | this study            | averages are given as median values |
| <i>pmoA</i> (cDNA) | post-infl19_spr | HC2   | 7                    | this study            | averages are given as median values |
| <i>pmoA</i> (cDNA) | post-infl19_aut | HC2   | 101                  | this study            | averages are given as median values |

---
