# Supplementary material for: Effects of brackish water inflow on methane cycling microbial communities in a freshwater rewetted coastal fen
Source: Copernicus journal article supplement (doi:10.5194/egusphere-2022-65), 2022-04-13
Supplement: Supplementary file 1 [file egusphere-2022-65-supplement.zip › Table S2.pdf]

## Supplements

**Table S2: Microbial sequencing data labels to synchronize data analysis with R script provided in “Data analysis Manuscript Gutekunst et al. (unpublished)” with the deposited samples at ENA database (Project Identifier: PRJEB52161, Sample Identifiers: ERS11559347 - ERS11559443, Run identifiers: ERR9538456 - ERR9538552)**

| Sample label                  | Original sample label | Sample accession in ENA | Sub-file name |
|-------------------------------|-----------------------|-------------------------|---------------|
| c_2019_may_HC2_00-00a_bac_DNA | c_2019_may_HC2_00-00a | ERS11559347             | DNA_bac       |
| c_2019_may_HC2_00-00b_bac_DNA | c_2019_may_HC2_00-00b | ERS11559348             | DNA_bac       |
| c_2019_may_HC2_00-20a_bac_DNA | c_2019_may_HC2_00-20a | ERS11559349             | DNA_bac       |
| c_2019_may_HC2_00-20b_bac_DNA | c_2019_may_HC2_00-20b | ERS11559350             | DNA_bac       |
| c_2019_may_HC2_20-40a_bac_DNA | c_2019_may_HC2_20-40a | ERS11559351             | DNA_bac       |
| c_2019_may_HC2_20-40b_bac_DNA | c_2019_may_HC2_20-40b | ERS11559352             | DNA_bac       |
| c_2019_may_HC2_40-50a_bac_DNA | c_2019_may_HC2_40-50a | ERS11559353             | DNA_bac       |
| c_2019_may_HC2_40-50b_bac_DNA | c_2019_may_HC2_40-50b | ERS11559354             | DNA_bac       |
| c_2019_nov_HC2_00-00a_bac_DNA | c_2019_nov_HC2_00-00a | ERS11559355             | DNA_bac       |
| c_2019_nov_HC2_00-00b_bac_DNA | c_2019_nov_HC2_00-00b | ERS11559356             | DNA_bac       |
| c_2019_nov_HC2_00-20a_bac_DNA | c_2019_nov_HC2_00-20a | ERS11559357             | DNA_bac       |
| c_2019_nov_HC2_00-20b_bac_DNA | c_2019_nov_HC2_00-20b | ERS11559358             | DNA_bac       |
| c_2019_nov_HC2_20-40a_bac_DNA | c_2019_nov_HC2_20-40a | ERS11559359             | DNA_bac       |
| c_2019_nov_HC2_20-40b_bac_DNA | c_2019_nov_HC2_20-40b | ERS11559360             | DNA_bac       |
| c_2019_nov_HC2_40-50a_bac_DNA | c_2019_nov_HC2_40-50a | ERS11559361             | DNA_bac       |
| c_2019_nov_HC2_40-50b_bac_DNA | c_2019_nov_HC2_40-50b | ERS11559362             | DNA_bac       |
| c_2019_nov_HC1_00-00a_bac_DNA | c_2019_nov_HC1_00-00a | ERS11559363             | DNA_bac       |
| c_2019_nov_HC1_00-00b_bac_DNA | c_2019_nov_HC1_00-00b | ERS11559364             | DNA_bac       |
| c_2019_nov_HC1_00-20a_bac_DNA | c_2019_nov_HC1_00-20a | ERS11559365             | DNA_bac       |
| c_2019_nov_HC1_00-20b_bac_DNA | c_2019_nov_HC1_00-20b | ERS11559366             | DNA_bac       |
| c_2019_nov_HC1_20-40a_bac_DNA | c_2019_nov_HC1_20-40a | ERS11559367             | DNA_bac       |
| c_2019_nov_HC1_20-40b_bac_DNA | c_2019_nov_HC1_20-40b | ERS11559368             | DNA_bac       |
| c_2019_nov_HC1_40-50a_bac_DNA | c_2019_nov_HC1_40-50a | ERS11559369             | DNA_bac       |
| c_2019_nov_HC1_40-50b_bac_DNA | c_2019_nov_HC1_40-50b | ERS11559370             | DNA_bac       |
| c_2019_dec_HC3_00-00b_bac_DNA | c_2019_dec_HC3_00-00b | ERS11559371             | DNA_bac       |
| c_2019_dec_HC3_00-20a_bac_DNA | c_2019_dec_HC3_00-20a | ERS11559372             | DNA_bac       |
| c_2019_dec_HC3_00-20b_bac_DNA | c_2019_dec_HC3_00-20b | ERS11559373             | DNA_bac       |
| c_2019_dec_HC3_20-40a_bac_DNA | c_2019_dec_HC3_20-40a | ERS11559374             | DNA_bac       |
| c_2019_dec_HC3_20-40b_bac_DNA | c_2019_dec_HC3_20-40b | ERS11559375             | DNA_bac       |
| c_2019_dec_HC3_40-50a_bac_DNA | c_2019_dec_HC3_40-50a | ERS11559376             | DNA_bac       |
| c_2019_dec_HC3_40-50b_bac_DNA | c_2019_dec_HC3_40-50b | ERS11559377             | DNA_bac       |
| c_2019_dec_HC4_00-00a_bac_DNA | c_2019_dec_HC4_00-00a | ERS11559378             | DNA_bac       |

|                               |                       |             |         |
|-------------------------------|-----------------------|-------------|---------|
| c_2019_dec_HC4_00-00b_bac_DNA | c_2019_dec_HC4_00-00b | ERS11559379 | DNA_bac |
| c_2019_dec_HC4_00-20a_bac_DNA | c_2019_dec_HC4_00-20a | ERS11559380 | DNA_bac |
| c_2019_dec_HC4_00-20b_bac_DNA | c_2019_dec_HC4_00-20b | ERS11559381 | DNA_bac |
| c_2019_dec_HC4_20-40a_bac_DNA | c_2019_dec_HC4_20-40a | ERS11559382 | DNA_bac |
| c_2019_dec_HC4_20-40b_bac_DNA | c_2019_dec_HC4_20-40b | ERS11559383 | DNA_bac |
| c_2019_dec_HC4_40-50a_bac_DNA | c_2019_dec_HC4_40-50a | ERS11559384 | DNA_bac |
| c_2019_dec_HC4_40-50b_bac_DNA | c_2019_dec_HC4_40-50b | ERS11559385 | DNA_bac |
| c_2019_may_HC2_00-00a_arc_DNA | c_2019_may_HC2_00-00a | ERS11559386 | DNA_arc |
| c_2019_may_HC2_00-00b_arc_DNA | c_2019_may_HC2_00-00b | ERS11559387 | DNA_arc |
| c_2019_may_HC2_00-20a_arc_DNA | c_2019_may_HC2_00-20a | ERS11559388 | DNA_arc |
| c_2019_may_HC2_00-20b_arc_DNA | c_2019_may_HC2_00-20b | ERS11559389 | DNA_arc |
| c_2019_may_HC2_20-40a_arc_DNA | c_2019_may_HC2_20-40a | ERS11559390 | DNA_arc |
| c_2019_may_HC2_20-40b_arc_DNA | c_2019_may_HC2_20-40b | ERS11559391 | DNA_arc |
| c_2019_may_HC2_40-50a_arc_DNA | c_2019_may_HC2_40-50a | ERS11559392 | DNA_arc |
| c_2019_may_HC2_40-50b_arc_DNA | c_2019_may_HC2_40-50b | ERS11559393 | DNA_arc |
| c_2019_nov_HC2_00-00a_arc_DNA | c_2019_nov_HC2_00-00a | ERS11559394 | DNA_arc |
| c_2019_nov_HC2_00-00b_arc_DNA | c_2019_nov_HC2_00-00b | ERS11559395 | DNA_arc |
| c_2019_nov_HC2_00-20a_arc_DNA | c_2019_nov_HC2_00-20a | ERS11559396 | DNA_arc |
| c_2019_nov_HC2_00-20b_arc_DNA | c_2019_nov_HC2_00-20b | ERS11559397 | DNA_arc |
| c_2019_nov_HC2_20-40a_arc_DNA | c_2019_nov_HC2_20-40a | ERS11559398 | DNA_arc |
| c_2019_nov_HC2_20-40b_arc_DNA | c_2019_nov_HC2_20-40b | ERS11559399 | DNA_arc |
| c_2019_nov_HC2_40-50a_arc_DNA | c_2019_nov_HC2_40-50a | ERS11559400 | DNA_arc |
| c_2019_nov_HC2_40-50b_arc_DNA | c_2019_nov_HC2_40-50b | ERS11559401 | DNA_arc |
| c_2019_nov_HC1_00-00a_arc_DNA | c_2019_nov_HC1_00-00a | ERS11559402 | DNA_arc |
| c_2019_nov_HC1_00-00b_arc_DNA | c_2019_nov_HC1_00-00b | ERS11559403 | DNA_arc |
| c_2019_nov_HC1_00-20a_arc_DNA | c_2019_nov_HC1_00-20a | ERS11559404 | DNA_arc |
| c_2019_nov_HC1_00-20b_arc_DNA | c_2019_nov_HC1_00-20b | ERS11559405 | DNA_arc |
| c_2019_nov_HC1_20-40a_arc_DNA | c_2019_nov_HC1_20-40a | ERS11559406 | DNA_arc |
| c_2019_nov_HC1_20-40b_arc_DNA | c_2019_nov_HC1_20-40b | ERS11559407 | DNA_arc |
| c_2019_nov_HC1_40-50a_arc_DNA | c_2019_nov_HC1_40-50a | ERS11559408 | DNA_arc |
| c_2019_nov_HC1_40-50b_arc_DNA | c_2019_nov_HC1_40-50b | ERS11559409 | DNA_arc |
| c_2019_dec_HC3_00-00a_arc_DNA | c_2019_dec_HC3_00-00a | ERS11559410 | DNA_arc |
| c_2019_dec_HC3_00-00b_arc_DNA | c_2019_dec_HC3_00-00b | ERS11559411 | DNA_arc |
| c_2019_dec_HC3_00-20a_arc_DNA | c_2019_dec_HC3_00-20a | ERS11559412 | DNA_arc |
| c_2019_dec_HC3_00-20b_arc_DNA | c_2019_dec_HC3_00-20b | ERS11559413 | DNA_arc |
| c_2019_dec_HC3_20-40a_arc_DNA | c_2019_dec_HC3_20-40a | ERS11559414 | DNA_arc |
| c_2019_dec_HC3_20-40b_arc_DNA | c_2019_dec_HC3_20-40b | ERS11559415 | DNA_arc |
| c_2019_dec_HC3_40-50a_arc_DNA | c_2019_dec_HC3_40-50a | ERS11559416 | DNA_arc |
| c_2019_dec_HC3_40-50b_arc_DNA | c_2019_dec_HC3_40-50b | ERS11559417 | DNA_arc |
| c_2019_dec_HC4_00-00a_arc_DNA | c_2019_dec_HC4_00-00a | ERS11559418 | DNA_arc |

|                                |                       |             |          |
|--------------------------------|-----------------------|-------------|----------|
| c_2019_dec_HC4_00-00b_arc_DNA  | c_2019_dec_HC4_00-00b | ERS11559419 | DNA_arc  |
| c_2019_dec_HC4_00-20a_arc_DNA  | c_2019_dec_HC4_00-20a | ERS11559420 | DNA_arc  |
| c_2019_dec_HC4_00-20b_arc_DNA  | c_2019_dec_HC4_00-20b | ERS11559421 | DNA_arc  |
| c_2019_dec_HC4_20-40a_arc_DNA  | c_2019_dec_HC4_20-40a | ERS11559422 | DNA_arc  |
| c_2019_dec_HC4_20-40b_arc_DNA  | c_2019_dec_HC4_20-40b | ERS11559423 | DNA_arc  |
| c_2019_dec_HC4_40-50a_arc_DNA  | c_2019_dec_HC4_40-50a | ERS11559424 | DNA_arc  |
| c_2019_dec_HC4_40-50b_arc_DNA  | c_2019_dec_HC4_40-50b | ERS11559425 | DNA_arc  |
| c_2019_may_HC2_00-00a_bac_cDNA | c_2019_may_HC2_00-00a | ERS11559426 | cDNA_bac |
| c_2019_may_HC2_00-00b_bac_cDNA | c_2019_may_HC2_00-00b | ERS11559427 | cDNA_bac |
| c_2019_may_HC2_00-20a_bac_cDNA | c_2019_may_HC2_00-20a | ERS11559428 | cDNA_bac |
| c_2019_may_HC2_00-20b_bac_cDNA | c_2019_may_HC2_00-20b | ERS11559429 | cDNA_bac |
| c_2019_may_HC2_20-40b_bac_cDNA | c_2019_may_HC2_20-40b | ERS11559430 | cDNA_bac |
| c_2019_nov_HC2_00-00a_bac_cDNA | c_2019_nov_HC2_00-00a | ERS11559431 | cDNA_bac |
| c_2019_nov_HC2_00-00b_bac_cDNA | c_2019_nov_HC2_00-00b | ERS11559432 | cDNA_bac |
| c_2019_nov_HC2_00-20a_bac_cDNA | c_2019_nov_HC2_00-20a | ERS11559433 | cDNA_bac |
| c_2019_nov_HC2_00-20b_bac_cDNA | c_2019_nov_HC2_00-20b | ERS11559434 | cDNA_bac |
| c_2019_may_HC2_00-00a_arc_cDNA | c_2019_may_HC2_00-00a | ERS11559435 | cDNA_arc |
| c_2019_may_HC2_00-00b_arc_cDNA | c_2019_may_HC2_00-00b | ERS11559436 | cDNA_arc |
| c_2019_may_HC2_00-20a_arc_cDNA | c_2019_may_HC2_00-20a | ERS11559437 | cDNA_arc |
| c_2019_may_HC2_00-20b_arc_cDNA | c_2019_may_HC2_00-20b | ERS11559438 | cDNA_arc |
| c_2019_may_HC2_20-40b_arc_cDNA | c_2019_may_HC2_20-40b | ERS11559439 | cDNA_arc |
| c_2019_nov_HC2_00-00a_arc_cDNA | c_2019_nov_HC2_00-00a | ERS11559440 | cDNA_arc |
| c_2019_nov_HC2_00-00b_arc_cDNA | c_2019_nov_HC2_00-00b | ERS11559441 | cDNA_arc |
| c_2019_nov_HC2_00-20a_arc_cDNA | c_2019_nov_HC2_00-20a | ERS11559442 | cDNA_arc |
| c_2019_nov_HC2_00-20b_arc_cDNA | c_2019_nov_HC2_00-20b | ERS11559443 | cDNA_arc |

---
