# Supplementary material for: Effects of brackish water inflow on methane cycling microbial communities in a freshwater rewetted coastal fen
Source: Copernicus journal article supplement (doi:10.5194/egusphere-2022-65), 2022-04-13
Supplement: Supplementary file [file egusphere-2022-65-AC2-supplement.pdf]

Accession or Name

Release status

Maximum rows

▼ 100 ▼

[Download all results \(https://www.ebi.ac.uk/ena/submit/report/projects/PRJEB52161?max-results=10000000&format=csv&token=eyJhbGciOiJSUzI1NiJ9.eyJwcm9udGUiOiJXZWJpbi00MDQzOCIsInJvbGUiOiJlcjE2NTQwNDMzMzkHxVv85Ey8gb4a8yNBaqRu9tRnXHG9ZXL9DLilPyUrUqCJyBhmigYl3pGFJ2ZwcWB9hM\\_fQUp1cp-zfQ-ZJHUL31\\_1nDQCgqsXmcZSE9WBUWT1NBiqlBcAalPBVyqbeLuokKT2MB3MhJ4H601zjtuPiQ50PpoOSq3rImnJxalKl\\_mifiMCDRDb25XB-ykl3s0Ldf10MUQ0c4AghjrWyp2mze9cZ00y8vBIU3vMv\\_hjDP-mSVmNg\)](https://www.ebi.ac.uk/ena/submit/report/projects/PRJEB52161?max-results=10000000&format=csv&token=eyJhbGciOiJSUzI1NiJ9.eyJwcm9udGUiOiJXZWJpbi00MDQzOCIsInJvbGUiOiJlcjE2NTQwNDMzMzkHxVv85Ey8gb4a8yNBaqRu9tRnXHG9ZXL9DLilPyUrUqCJyBhmigYl3pGFJ2ZwcWB9hM_fQUp1cp-zfQ-ZJHUL31_1nDQCgqsXmcZSE9WBUWT1NBiqlBcAalPBVyqbeLuokKT2MB3MhJ4H601zjtuPiQ50PpoOSq3rImnJxalKl_mifiMCDRDb25XB-ykl3s0Ldf10MUQ0c4AghjrWyp2mze9cZ00y8vBIU3vMv_hjDP-mSVmNg)

| Accession  | Secondary Accession | Title                                                                                                | Submission date | Release date                                                                                           | Status  | Action |
|------------|---------------------|------------------------------------------------------------------------------------------------------|-----------------|--------------------------------------------------------------------------------------------------------|---------|--------|
| PRJEB52161 | ERP136848           | Microorganisms as drivers of CH4 production and exchange in coastal fens after brackish water inflow | 6th Apr 2022    | 31st Oct 2022<br> | Private |        |
